# Supplementary material for: Origin of highly stable conductivity of H plasma exposed ZnO films
Source: Royal Society of Chemistry journal article supplement (doi:10.1039/c3cp52691g), 2013-01-01
Supplement: c3cp52691g.pdf [file c3cp52691g.pdf]

## Electronic supplementary information:

### Origin of highly-stable conductivity of H plasma exposed ZnO films

Wenfeng Chen, Liping Zhu,\* Yaguang Li, Liang Hu, Yanmin Guo, Hongbin Xu, Zhizhen Ye

State Key Laboratory of Silicon Materials, Department of Materials Science and Engineering, Zhejiang University, Hangzhou, 310027, P. R. China.

Fax: +86-571-87952625; Tel: +86-571-87951958; E-mail: [zlp1@zju.edu.cn](mailto:zlp1@zju.edu.cn)

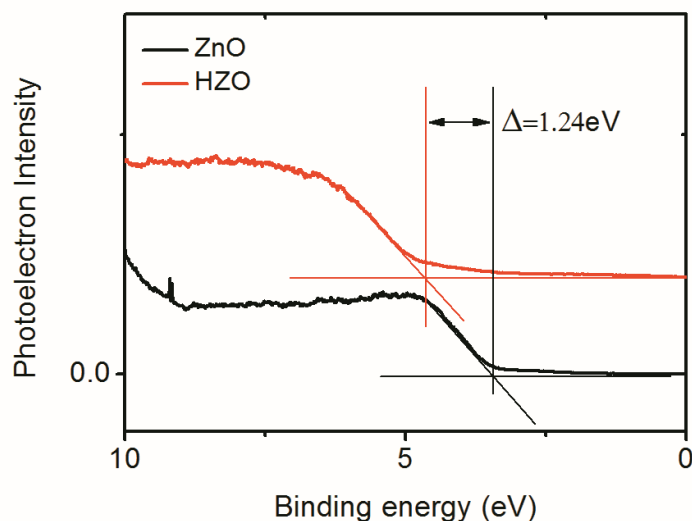

**Figure S1.** UPS spectra of ZnO (black) and HZO (red) films. After H plasma treatment, spectra moved leftward about 1.24 eV, indicating a patent increase of Fermi Energy level.
